1

2

3 Imprinted genes in a founder population

4

5 Parent of origin gene expression in a founder population identifies two new

6 imprinted genes at known imprinted regions.

7

8

9

10 Sahar V. Mozaffari<sup>1,2\*</sup>, Michelle M. Stein<sup>2</sup>, Kevin M. Magnaye<sup>2</sup>, Dan L. Nicolae<sup>1,2,3</sup>, Carole

11 Ober<sup>1,2</sup>

12

13 <sup>1</sup>Committee on Genetics, Genomics & Systems Biology, University of Chicago, Chicago,

14 Illinois, United States of America

15 <sup>2</sup>Department of Human Genetics, University of Chicago, Chicago, Illinois, United States of

16 America

17 <sup>3</sup>Department of Statistics, University of Chicago, Chicago, Illinois, United States of America

18

19 \* Corresponding author

20 E-mail: [smozaffari@uchicago.edu](mailto:smozaffari@uchicago.edu) (SVM)

21

## 22 **Abstract**

23           Genomic imprinting is the phenomena that leads to silencing of one copy of a gene  
24 inherited from a specific parent. Mutations in imprinted regions have been involved in diseases  
25 showing parent of origin effects. Identifying genes with evidence of parent of origin expression  
26 patterns in family studies allows the detection of more subtle imprinting. Here, we use allele  
27 specific expression in lymphoblastoid cell lines from 306 Hutterites related in a single pedigree  
28 to provide formal evidence for parent of origin effects. We take advantage of phased genotype  
29 data to assign parent of origin to RNA-seq reads in individuals with gene expression data. Our  
30 approach identified known imprinted genes, two putative novel imprinted genes, and 14 genes  
31 with asymmetrical parent of origin gene expression. We used gene expression in peripheral  
32 blood leukocytes (PBL) to validate our findings, and then confirmed imprinting control regions  
33 (ICRs) using DNA methylation levels in the PBLs.

## 34 **Author Summary**

35           Large scale gene expression studies have identified known and novel imprinted genes  
36 through allele specific expression without knowing the parental origins of each allele. Here, we  
37 take advantage of phased genotype data to assign parent of origin to RNA-seq reads in 306  
38 individuals with gene expression data. We identified known imprinted genes as well as two  
39 novel imprinted genes in lymphoblastoid cell line gene expression. We used gene expression in  
40 PBLs to validate our findings, and DNA methylation levels in PBLs to confirm previously  
41 characterized imprinting control regions that could regulate these imprinted genes.

## 42 **Introduction**

43           Imprinted genes have one allele silenced in a parent of origin specific manner. In humans,  
44 approximately 105 imprinted loci have been identified, many of which play important roles in

45 development and growth[1-3]. Dysregulation of imprinted genes or regions can cause diseases  
46 that show parent of origin effects, such as Prader-Willi or Angelman syndrome, among others  
47 [2]. Imprinted regions have also been associated with complex traits, such as height and age of  
48 menarche [4,5], as well as common diseases such as obesity and some cancers [2]. More than  
49 80% of imprinted genes in humans are clustered in genomic regions that contain both maternally  
50 and paternally expressed genes, as well as genes that encode non-coding RNAs[2,6]. Parent-  
51 specific expression of the genes within a cluster are maintained by complex epigenetic  
52 mechanisms at cis-acting imprinting control regions (ICRs) [3], which show parent of origin  
53 specific DNA methylation patterns and chromatin modifications[7].

54       Using RNA-seq and allele specific expression (ASE) we can map genes to parental  
55 haplotypes and identify those that are expressed when inherited from only the father or only from  
56 the mother, a hallmark feature of imprinted loci. Parent of origin effects and imprinted genes  
57 have been most elegantly studied in mice, where two inbred strains are bred reciprocally to  
58 identify parent of origin effects on gene expression in progeny that have the same genotypes but  
59 different patterns of inheritance [8]. Additionally, uniparental inheritance of imprinted regions in  
60 mice were associated with abnormal developmental phenotypes [9] before it was shown that  
61 imprinting defects are associated with human disease[10,11]. One approach to identifying  
62 imprinted loci in humans has been to test for parent of origin effects on gene expression and  
63 phenotypes in pedigrees [4,12]. For example, Garg et al. used gene expression in LCLs from  
64 HapMap trios to identify 30 imprinting eQTLs with parent of origin specific effects on  
65 expression [13]. A study from the GTEx Consortium used RNA-seq data and allele specific  
66 expression to identify allelic imbalance in 45 different tissues. By considering genes with  
67 monoallelic expression that was evenly distributed to both the reference and alternate alleles

68 across individuals as evidence for imprinting, they identified 42 imprinted genes, both known  
69 and novel, and used family studies to confirm imprinting of 5 novel imprinted genes [14].  
70 Santoni et al. identified nine novel imprinted genes using single-cell allele-specific gene  
71 expression and identifying genes with mono-allelic expression in fibroblasts from 3 unrelated  
72 individuals and probands of 2 family trios, and then used the trios to confirm parent of origin of  
73 the alleles [15].

74 Here, we perform a parent of origin ASE study in a large pedigree to characterize parent  
75 of origin specific gene expression in the Hutterites, a founder population of European descent,  
76 for which we have phased genotype data [16]. We use RNA-seq from lymphoblastoid cell lines  
77 (LCLs) to map transcripts to parental haplotypes and identify known and two not previously  
78 reported imprinted genes. We validated the two putative imprinted genes by showing the same  
79 patterns of parent of origin expression PBLs from different Hutterite individuals, and show DNA  
80 methylation signatures of imprinting in the PBLs at these regions.

81

## 82 **Results**

### 83 **Mapping transcripts to parental haplotypes**

84 For each of 306 individuals, the total number of transcripts at each gene was assigned as  
85 maternally inherited, paternally inherited, or unknown parent of origin. The last group included  
86 transcripts without heterozygote SNPs or transcripts with SNPs without parent of origin  
87 information. Transcripts were assigned to the parentally inherited categories using SNPs in the  
88 reads and matching alleles to either the known maternally or paternally inherited alleles. All the  
89 genes analyzed had some transcripts of unknown origin (average 97.8%, range 8.3-100%). For  
90 each gene we assigned parental origin to an average of 1.8% of transcripts (range: 0-34.7%), and

91 for each individual we assigned parental origin to an average of 1.4% of transcripts (range: 0-  
92 1.7%). On average, about 40 SNPs per gene were used to assign the transcripts of a gene to  
93 parent (range 1-1839 SNPs).

94 **Table 1. Summary Statistics for Parental Origin of Transcripts.**

|                                                                                    | Mean  | Standard Deviation | Range      |
|------------------------------------------------------------------------------------|-------|--------------------|------------|
| Proportion of transcripts from each gene assigned to transcripts of unknown origin | 0.978 | 0.031              | (0.083, 1) |
| Proportion of transcripts from each gene assigned to parental origin               | 0.018 | 0.019              | (0, 0.347) |
| Proportion of transcripts for each individual assigned to parental origin          | 0.014 | 0.0015             | (0, 0.017) |

95

96 After quality control (see Methods), transcripts in 15,889 genes were detected as  
97 expressed in 306 individuals. Some transcripts for 14,791 of those genes could be assigned to a  
98 parent. Of these, 75 genes were only expressed on the paternally-inherited allele in at least one  
99 individual and not on the maternally inherited allele in any individuals. Similarly, 64 genes were  
100 only expressed on the maternally-inherited allele in at least one individual and not on the  
101 paternally inherited allele in any individuals (S1 Table).

### 102 **Imprinted Genes in Lymphoblastoid Cell Lines (LCLs)**

103 Among the 139 genes with only paternally inherited expression or only maternally  
104 inherited expression, there are three known imprinted genes (*CDKN1C*, *NDN*, *SNRPN*) and one  
105 previously predicted to be imprinted (*IFITM1*) [17]. *CDKN1C* showed patterns opposite of what  
106 has been reported [18,19], which could be due to the small sample (only three individuals  
107 showed expression from one parent) or to the different cell types used here (LCLs) and in  
108 previous studies (developing brain and embryonal tumors for *CDKN1C*).

109 We expect some imprinted genes to have ‘leaky’ expression, such that there is some  
 110 expression from the parental chromosome that is mostly silenced. To detect these genes, we used  
 111 a binomial test to find patterns of gene expression asymmetry by parental transcript levels. This  
 112 analysis identified 28 genes with an FDR <5% (Table 2). The 11 genes that showed the most  
 113 asymmetry are known imprinted genes: *ZDBF2*, *PEG10*, *SNHG14*, *NHP2L1*, *L3MBTL1*,  
 114 *ZNF331*, *LPAR6*, *FAM50B*, *KCNQ1*, *NAPIL5*, and *IGF1R*. Parent of origin expression for  
 115 *ZDBF2* and *KCNQ1* are shown in **Fig 1A** and **1B**, respectively. We identified two additional  
 116 genes that showed asymmetry in parental expression from mostly one parent (*PXDC1*, *PWAR6*),  
 117 which we consider potentially new imprinted genes. The remaining fourteen genes showed  
 118 significant patterns of asymmetry but had expression from both maternal and paternal  
 119 chromosomes. These genes are likely not imprinted but could have asymmetry in expression due  
 120 to an expression quantitative trait loci (eQTL).

121 **Table 2. Results for Gene with Parent of Origin Expression Asymmetry.** Genes listed by  
 122 category of imprinting status: (A) Known Imprinted, (B) Conflicting Evidence for Imprinted  
 123 Status, (C) New Imprinted Genes, (D) Genes with Asymmetrical Parent of Origin Expression.  
 124 Genes are ordered by significance within each category.

125

| Gene               | p-value  | Number of individuals with more maternal expression than paternal expression | Number of individuals with more paternal expression than maternal expression | References                                             |
|--------------------|----------|------------------------------------------------------------------------------|------------------------------------------------------------------------------|--------------------------------------------------------|
| A. Known Imprinted |          |                                                                              |                                                                              |                                                        |
| <i>ZDBF2</i>       | 1.59e-41 | 2                                                                            | 148                                                                          | geneimprint.com, Baran et al.[14], and Babak et al.[8] |
| <i>PEG10</i>       | 5.51e-38 | 2                                                                            | 136                                                                          | geneimprint.com, Baran et al.[14], and Babak et al.[8] |

|                                                                        |          |     |     |                                                                                 |
|------------------------------------------------------------------------|----------|-----|-----|---------------------------------------------------------------------------------|
| <i>SNHG14</i>                                                          | 1.64e-36 | 2   | 131 | Baran et al. [14]                                                               |
| <i>NHP2L1</i>                                                          | 1.24e-33 | 23  | 189 | Babak et al. [8] and Docherty et al.[20]                                        |
| <i>L3MBTL1</i>                                                         | 6.72e-31 | 2   | 107 | geneimprint.com and Li et al.[21]                                               |
| <i>ZNF331</i>                                                          | 4.05e-25 | 36  | 184 | Daelemans et al. [22]and Baran et al. [14]                                      |
| <i>LPAR6</i>                                                           | 2.65e-23 | 0   | 76  | Baran et al. [14]                                                               |
| <i>FAM50B</i>                                                          | 5.29e-23 | 0   | 75  | geneimprint.com, Baran et al. [14]                                              |
| <i>KCNQ1</i>                                                           | 1.34e-22 | 79  | 1   | geneimprint.com, Baran et al. [14]                                              |
| <i>NAP1L5</i>                                                          | 3.76e09  | 0   | 29  | geneimprint.com                                                                 |
| <i>IGF1R</i>                                                           | 1.11e-05 | 14  | 49  | Geneimprint.com, Sun et al. [23,24], Boucher et al. [25], Al Adhami et al. [26] |
| <b>B. Conflicting Evidence for Imprinting Status in the literature</b> |          |     |     |                                                                                 |
| <i>PRIM2</i>                                                           | 5.53e-05 | 30  | 71  | geneimprint.com, Santoni et al. [15]                                            |
| <b>C. New Imprinted Genes</b>                                          |          |     |     |                                                                                 |
| <i>PXDC1</i>                                                           | 9.83e-14 | 12  | 81  | -                                                                               |
| <i>PWAR6</i>                                                           | 2.27e-13 | 0   | 43  | -                                                                               |
| <b>D. Genes with Asymmetrical Parent of Origin Expression</b>          |          |     |     |                                                                                 |
| <i>SNHG17</i>                                                          | 6.2e-08  | 113 | 45  | -                                                                               |
| <i>ZNF813</i>                                                          | 8.7e-07  | 63  | 132 | -                                                                               |
| <i>DAAMI</i>                                                           | 1.78e-05 | 66  | 126 | -                                                                               |
| <i>RP11-379H18.1</i>                                                   | 2.09e-05 | 52  | 106 | -                                                                               |
| <i>HMGNI38</i>                                                         | 2.43e-05 | 32  | 6   | -                                                                               |
| <i>MTX2</i>                                                            | 3.05e-05 | 0   | 16  | -                                                                               |
| <i>ZNF714</i>                                                          | 4.61e-05 | 35  | 79  | -                                                                               |
| <i>MAF1</i>                                                            | 4.45e-05 | 17  | 51  | -                                                                               |
| <i>IL16</i>                                                            | 5.71e-05 | 61  | 115 | -                                                                               |
| <i>CPNE1</i>                                                           | 5.56e-05 | 111 | 58  | -                                                                               |

|                  |          |     |    |   |
|------------------|----------|-----|----|---|
| <i>ATP6V0D1</i>  | 7.03e-05 | 32  | 7  | - |
| <i>FAHD1</i>     | 9.34e-05 | 68  | 29 | - |
| <i>CNN2</i>      | 1.18e-04 | 127 | 72 | - |
| <i>HSP90AB3P</i> | 1.16e-04 | 7   | 31 | - |

126

127 Two genes showed gene expression signatures consistent with imprinting but have not  
128 previously been recognized as imprinted genes. The first potentially new imprinted gene is  
129 *PXDC1*, which is in the same region and next to (<100kb) a known imprinted gene, *FAM50B*.  
130 The second potentially novel imprinted gene is *PWAR6*, or Prader Willi Angelman Region  
131 RNA6, a gene encoding a regulatory class of RNA. Although this gene is located within the  
132 intron of a known imprinted gene, *SNHG14*, this noncoding RNA has not previously been  
133 recognized as having parent of origin specific expression (**Fig 1C**).

134 The remaining fourteen genes show significant asymmetry using the binomial test but do  
135 not have expression from mostly one parental chromosome. One of these genes, *SNHG17*, is a  
136 noncoding RNA. Another gene with parent of origin asymmetry, *ZNF813*, is next to a known  
137 imprinted gene, *ZNF331*. The remaining genes with asymmetrical parent origin expression have  
138 expression from both parental chromosomes, unlike imprinted genes. These genes include  
139 *DAAMI*, which is involved in cytoskeleton, specifically filopodia formation [27,28], and has a  
140 suggested role for cytoskeleton organization during Mammalian testis morphogenesis and  
141 gamete progression [29]; *RP11-379H18.1*, a noncoding RNA gene; *HMGNI38* [30]; *MTX2*, a  
142 nuclear gene that interacts with mitochondrial membrane protein metaxin 1 and is involved in  
143 mitochondrial protein import and metabolism of proteins in mice; *MAF1*, a negative regulator of  
144 RNA polymerase 2; *ZNF714*, *CPNE1*, *IL16*, *ATP6V0D1*, *FAHD1*, *HSP90AB3P*, and *CNN2* are



145 the remaining genes that show parent of origin asymmetry but not with a pattern consistent with  
146 imprinting (**S1 Figure**).

### 147 **Validation of Imprinted Genes in PBLs**

148 Using the same methods described above, we assigned parent of origin to transcripts in  
149 PBLs from 99 Hutterite individuals not included in the LCL studies. Maternal and paternal  
150 expression in PBLs for all 28 genes identified in LCLs showed similar trends of asymmetry as in  
151 LCLs (**Fig 2**).

### 152 **Methylation at Imprinting Control Regions.**

153 One of the mechanisms underlying parent of origin effects on expression at imprinted  
154 loci is differential methylation at cis-acting imprinting control regions (ICRs). DNA methylation  
155 from the Illumina HumanMethylation 450K array was available in PBLs from the same  
156 individuals included in the validation study described above. To determine the expected patterns  
157 of methylation at known imprinted loci, we first looked at previously characterized methylated  
158 regions at known imprinted regions from Court et al. and Joshi et al. [31,32].

159 The methylation patterns at the two potentially novel imprinted genes identified in this  
160 study, *PXDC1* and *PWAR6*, lie in or near known imprinted regions that contain previously  
161 characterized ICRs. These previously characterized ICRs show about 50% methylation (beta  
162 value of between 0.25 and 0.75) in our DNA methylation data, which likely reflect methylation  
163 at only one parental chromosome in all the cells in the sample. Methylation patterns in PBLs at  
164 these two ICRs fall within this hemi-methylation range, further suggesting that these two genes  
165 are indeed imprinted (**Fig 3**).

166

## 167 **Discussion**

168           Dysregulation of imprinted genes can have a large impact on mammalian development  
169 and has been associated with significant diseases in humans. Studies aimed at identifying  
170 imprinted genes at genome-wide levels have used allele specific expression and imbalance to  
171 infer parent of origin. Here we used a large pedigree with assigned parent of origin alleles to map  
172 transcripts to chromosomes with known parent of origin and identify imprinted genes.

173           Using this approach, we found genes with expression primarily from either the maternal  
174 or paternal haplotype. Because gene silencing at imprinted loci may be incomplete, we used a  
175 binomial test on parent of origin gene expression and identified 11 known imprinted genes and  
176 two potentially novel imprinted genes. Both of these novel genes, *PWAR6* and *PXDC1*, lie in  
177 known imprinted regions but have not themselves been characterized as imprinted. The  
178 remaining genes that have significant parent of origin asymmetry in gene expression do not show  
179 clear imprinting expression patterns. To validate these findings, we mapped gene expression in  
180 PBLs from Hutterite individuals not included in the LCL study. The same genes showed similar  
181 patterns of asymmetry in these different cell sources (transformed B cells and peripheral blood  
182 leukocytes) from different individuals.

183           We also characterized methylation patterns near genes showing asymmetry. Using results  
184 from studies that had previously characterized ICRs in patients with uniparental disomy at many  
185 imprinted regions [31,32], we estimated regions for defining hemi-methylation near the genes  
186 identified in our study. Using this approach, we were able to provide additional supportive data  
187 for the two potentially new imprinted genes to be true imprinted genes regulated by previously  
188 characterized ICRs.

189           Although our study is the largest pedigree-based study to date to search genome-wide for  
190   imprinted genes, it has limitations. First, we are able to determine the parent of origin for a many  
191   transcripts in the Hutterites but we could not assign every RNA sequencing read to a parent due  
192   to lack of heterozygous sites or missing parent of origin information for alleles. Second, we  
193   conducted these studies in lymphoblastoid cell lines, and therefore could only study genes  
194   imprinted in this cell type and would miss the many imprinted genes that are tissue-specific  
195   and/or developmentally regulated[33]. Third, while we can verify previously characterized ICRs,  
196   our study is not designed to identify novel ICRs because DNA methylation values from an array  
197   cannot be assigned to parental haplotype. Lastly, although we characterized the gene expression  
198   and methylation patterns for two potentially novel imprinted genes, replication of these genes in  
199   a different population and in different tissues, and functional characterization of these genes are  
200   required to confirm their status as imprinted genes. Similarly, some of the other genes with  
201   parent of origin asymmetry in the blood cells examined in this study may show more clear-cut  
202   evidence for imprinting in other tissues or at specific periods of development.

203           In summary, we have identified two new imprinted genes using gene expression from a  
204   founder population. The genes with asymmetrical parental expression had similar patterns of  
205   asymmetry in a different source of blood cells and in different individuals, and we were able to  
206   replicate the methylation patterns in known ICRs near the known and novel imprinted genes in  
207   this study. Our method and study population allowed us to map reads to parental haplotypes and  
208   uncovered *PWAR6* and *PXDC1* as new imprinted genes that could potentially impact disease risk  
209   and development.

210

211

## 212 **Methods**

### 213 **Genotypes**

214 Hutterite individuals (n=1,653) were genotyped using one of three Affymetrix genotype  
215 arrays, as previously described [16], of which 121 underwent whole genome sequencing by  
216 Complete Genomics, Inc (CGI) (n=98) or Illumina whole genome sequencing (n=27). A total of  
217 10,235,233 variants present in the sequenced individuals were imputed and phased to the  
218 remaining 1,532 genotyped individuals using PRIMAL [16]. Parent of origin was assigned to  
219 89.85% of the alleles with call rate 81.6842% after QC. For this study, we included individuals  
220 with genotyped parents in the primary analyses in LCLs. Written consents for these studies were  
221 obtained from the adult participants and parents of children under 18; written assents were  
222 obtained from all children. This study was approved by the University of Chicago Institutional  
223 Review Board.

### 224 **RNA-seq in Lymphoblastoid Cell Lines (LCLs).**

225 RNA-seq was performed in LCLs as previously described [34]. For this study,  
226 sequencing reads were reprocessed as follows. Reads were trimmed for adaptors using Cutadapt  
227 (reads less than 5 bp discarded) then remapped to hg19 using STAR indexed with gencode  
228 version 19 gene annotations [35,36]. To remove mapping bias, reads were processed and  
229 duplicate reads removed using WASP [37]. We used a custom script modified from WASP to  
230 separate reads that overlap maternal alleles or paternal alleles. Reads without informative SNPs  
231 (homozygous, or no parent of origin information) were categorized as unknown where the  
232 unknown, maternal, and paternal make up the total gene expression. Gene counts were quantified  
233 using STAR for each category. VerifyBamID was used to identify sample swaps [38]. Genes

234 mapping to the X and Y chromosome were removed; genes with a CPM log transformed value  
235 less than 1 in less than 20 individuals were also removed.

### 236 **RNA-seq in Peripheral Blood Leukocytes (PBLs)**

237 RNA-seq was performed in whole blood as previously described [39]. For this study,  
238 sequencing reads were reprocessed as described above for the studies in LCLs. For these  
239 analyses, we excluded 32 individuals who were also in the LCL study.

### 240 **Identifying Imprinted Genes**

241 We used a binomial test to detect asymmetry in parent of origin gene expression. Using  
242 the paternally and maternally assigned reads, we generated a binomial Z-score for each  
243 individual for each gene ( $Z_i$ ) and excluded those where  $Z_i=0$ . For each gene, the number of  
244 subjects with  $Z_i > 0$  can be modeled by a Binomial distribution with probability  $\frac{1}{2}$ , under the null  
245 hypotheses of symmetric expression. For imprinted genes that show patterns of asymmetry, we  
246 expect a distribution of Z-scores that are skewed to one direction corresponding to asymmetric  
247 expression. Because we are only asking whether there are more individuals with more maternal  
248 expression or more paternal expression and not gene expression measures there is no need to  
249 model over-dispersion.

### 250 **DNA methylation profiling and processing in PBLs**

251 One milliliter of whole blood from 145 Hutterites was drawn into TruCulture (Myriad  
252 RBM; Austin, Texas) tubes containing proprietary TruCulture media. DNA was extracted using  
253 AllPrep DNA/RNA Mini Kits (Qiagen). DNA samples were bisulfite converted and hybridized  
254 to the Illumina HumanMethylation 450K array at the University of Chicago Functional  
255 Genomics Center. Samples were processed using default parameters using the R package minfi  
256 [40], normalized using SWAN (subset within-array normalization [41]) and quantile normalized

257 similar to previous methylation studies [42]. Probes were removed if: (1) mapped non-uniquely  
258 to a bisulfite-converted genome; (2) mapped to sex chromosomes; (3) had a probe detection p-  
259 value  $>0.01$  in at least 25% of samples; and (4) contained common SNPs within the probe  
260 sequence, as previously described [43]. Principal components analysis (PCA) was used to  
261 identify significant technical covariates, and the ComBat function [44] within the R package sva  
262 [45] was used to correct for chip effect. Analyses of DNA methylation levels were conducted  
263 using beta values, which were converted from M-values using the lumi R package [46].

264

## 265 **Acknowledgements**

266 We thank members of the Ober lab for useful discussions, Joe Urbanski and Lorenzo Pesce for  
267 assistance using Beagle, the many members of our field trip teams, and the Hutterites for their  
268 continued support of our studies.

## 269 **Funding Disclosure on Submission System**

270 This work was supported by NIH grants HL085197 and HD21244; and in part by NIH through  
271 resources provided by the Computation Institute and the Biological Sciences Division of the  
272 University of Chicago and Argonne National Laboratory, under grant 1S10OD018495-01.

273 S.V.M has been supported by NIH Grant T32 GM007197 and the Ruth L. Kirschstein NRSA  
274 Award F31HL134315.

275

## 276 **References**

- 277 1. Falls JG, Pulford DJ, Wylie AA, Jirtle RL. Genomic Imprinting: Implications for Human  
278 Disease. *The American Journal of Pathology*. 1999;154: 635–647. doi:10.1016/S0002-  
279 9440(10)65309-6
- 280 2. Peters J. The role of genomic imprinting in biology and disease: an expanding view. *Nat*  
281 *Rev Genet*. 2014;15: 517–530. doi:10.1038/nrg3766
- 282 3. Kalish JM, Jiang C, Bartolomei MS. Epigenetics and imprinting in human disease. *Int J*  
283 *Dev Biol*. 2014;58: 291–298. doi:10.1387/ijdb.140077mb
- 284 4. Benonisdottir S, Oddsson A, Helgason A, Kristjansson RP, Sveinbjornsson G,  
285 Oskarsdottir A, et al. Epigenetic and genetic components of height regulation. *Nat*  
286 *Comms*. 2016;7: 13490. doi:10.1038/ncomms13490
- 287 5. Zoledziewska M, Sidore C, Chiang CWK, Sanna S, Mulas A, Steri M, et al. Height-  
288 reducing variants and selection for short stature in Sardinia. *Nat Genet*. 2015;47: 1352–  
289 1356. doi:10.1038/ng.3403
- 290 6. Barlow DP, Bartolomei MS. Genomic Imprinting in Mammals. *Cold Spring Harbor*  
291 *Perspectives in Biology*. 2014;6: a018382–a018382. doi:10.1101/cshperspect.a018382
- 292 7. Abramowitz LK, Bartolomei MS. Genomic imprinting: recognition and marking of  
293 imprinted loci. *Curr Opin Genet Dev*. 2012;22: 72–78. doi:10.1016/j.gde.2011.12.001
- 294 8. Babak T, DeVeale B, Tsang EK, Zhou Y, Li X, Smith KS, et al. Genetic conflict reflected  
295 in tissue-specific maps of genomic imprinting in human and mouse. *Nat Genet*. 2015;47:  
296 544–549. doi:10.1038/ng.3274
- 297 9. Cattanaach BM, Kirk M. Differential activity of maternally and paternally derived  
298 chromosome regions in mice. *Nature*. Nature Publishing Group; 1985;315: 496–498.  
299 doi:10.1038/315496a0
- 300 10. Nicholls RD, Knoll J, Butler MG, Nature SK. Genetic imprinting suggested by maternal  
301 heterodisomy in non-deletion Prader-Willi syndrome. *naturecom*. 1989.
- 302 11. Reik W. Genomic imprinting and genetic disorders in man. *Trends in Genetics*. Elsevier  
303 *Current Trends*; 1989;5: 332–336. doi:10.1016/0168-9525(89)90138-8
- 304 12. Kong A, Steinthorsdottir V, Masson G, Thorleifsson G, Sulem P, Besenbacher S, et al.  
305 Parental origin of sequence variants associated with complex diseases. *Nature*. 2009;462:  
306 868–874. doi:10.1038/nature08625
- 307 13. Garg P, Borel C, Sharp AJ. Detection of Parent-of-Origin Specific Expression  
308 Quantitative Trait Loci by Cis-Association Analysis of Gene Expression in Trios.  
309 Chadwick BP, editor. *PLoS ONE*. 2012;7: e41695. doi:10.1371/journal.pone.0041695

- 310 14. Baran Y, Subramaniam M, Biton A, Tukiainen T, Tsang EK, Rivas MA, et al. The  
311 landscape of genomic imprinting across diverse adult human tissues. *Genome Research*.  
312 2015;25: 927–936. doi:10.1101/gr.192278.115
- 313 15. Santoni FA, Stamoulis G, Garieri M, Falconnet E, Ribaux P, Borel C, et al. Detection of  
314 Imprinted Genes by Single-Cell Allele-Specific Gene Expression. *Am J Hum Genet*.  
315 2017;100: 444–453. doi:10.1016/j.ajhg.2017.01.028
- 316 16. Livne OE, Han L, Alkorta-Aranburu G, Wentworth-Sheilds W, Abney M, Ober C, et al.  
317 PRIMAL: Fast and Accurate Pedigree-based Imputation from Sequence Data in a Founder  
318 Population. McHardy AC, editor. *PLoS Comput Biol*. 2015;11: e1004139.  
319 doi:10.1371/journal.pcbi.1004139
- 320 17. Luedi PP, Dietrich FS, Weidman JR, Bosko JM, Jirtle RL, Hartemink AJ. Computational  
321 and experimental identification of novel human imprinted genes. *Genome Research*.  
322 2007;17: 1723–1730. doi:10.1101/gr.6584707
- 323 18. Hatada I, Mukai T. Genomic imprinting of p57KIP2, a cyclin-dependent kinase inhibitor,  
324 in mouse. *Nat Genet*. Nature Publishing Group; 1995;11: 204–206. doi:10.1038/ng1095-  
325 204
- 326 19. Matsuoka S, Thompson JS, Edwards MC, Bartletta JM, Grundy P, Kalikin LM, et al.  
327 Imprinting of the gene encoding a human cyclin-dependent kinase inhibitor, p57KIP2, on  
328 chromosome 11p15. *Proc Natl Acad Sci USA*. National Academy of Sciences; 1996;93:  
329 3026–3030.
- 330 20. Docherty LE, Rezwan FI, Poole RL, Jagoe H, Lake H, Lockett GA, et al. Genome-wide  
331 DNA methylation analysis of patients with imprinting disorders identifies differentially  
332 methylated regions associated with novel candidate imprinted genes. *J Med Genet*.  
333 2014;51: 229–238. doi:10.1136/jmedgenet-2013-102116
- 334 21. Li J, Bench AJ, Vassiliou GS, Fourouclas N, Ferguson-Smith AC, Green AR. Imprinting  
335 of the human L3MBTL gene, a polycomb family member located in a region of  
336 chromosome 20 deleted in human myeloid malignancies. *Proc Natl Acad Sci USA*.  
337 National Acad Sciences; 2004;101: 7341–7346. doi:10.1073/pnas.0308195101
- 338 22. Daelemans C, Ritchie ME, Smits G, Abu-Amero S, Sudbery IM, Forrest MS, et al. High-  
339 throughput analysis of candidate imprinted genes and allele-specific gene expression in  
340 the human term placenta. *BMC Genet*. 2010;11: 25. doi:10.1186/1471-2156-11-25
- 341 23. Sun J, Li W, Sun Y, Yu D, Wen X, Wang H, et al. A novel antisense long noncoding  
342 RNA within the IGF1R gene locus is imprinted in hematopoietic malignancies. *Nucleic  
343 Acids Res*. 2014;42: 9588–9601. doi:10.1093/nar/gku549
- 344 24. Kang L, Sun J, Wen X, Cui J, Wang G, Hoffman AR, et al. Aberrant allele-switch  
345 imprinting of a novel IGF1R intragenic antisense non-coding RNA in breast cancers. *Eur J  
346 Cancer*. 2015;51: 260–270. doi:10.1016/j.ejca.2014.10.031



- 347 25. Boucher J, Charalambous M, Zarse K, Mori MA, Kleinridders A, Ristow M, et al. Insulin  
348 and insulin-like growth factor 1 receptors are required for normal expression of imprinted  
349 genes. *Proc Natl Acad Sci USA*. National Acad Sciences; 2014;111: 14512–14517.  
350 doi:10.1073/pnas.1415475111
- 351 26. Adhami Al H, Evano B, Le Digarcher A, Gueydan C, Dubois E, Parrinello H, et al. A  
352 systems-level approach to parental genomic imprinting: the imprinted gene network  
353 includes extracellular matrix genes and regulates cell cycle exit and differentiation.  
354 *Genome Research*. Cold Spring Harbor Lab; 2015;25: 353–367.  
355 doi:10.1101/gr.175919.114
- 356 27. Hoffmann A-K, Naj X, Linder S. Daam1 is a regulator of filopodia formation and  
357 phagocytic uptake of *Borrelia burgdorferi* by primary human macrophages. *FASEB J*.  
358 2014;28: 3075–3089. doi:10.1096/fj.13-247049
- 359 28. Luo W, Lieu ZZ, Manser E, Bershadsky AD, Sheetz MP. Formin DAAM1 Organizes  
360 Actin Filaments in the Cytoplasmic Nodal Actin Network. Aspenstrom P, editor. *PLoS*  
361 *ONE*. Public Library of Science; 2016;11: e0163915–22.  
362 doi:10.1371/journal.pone.0163915
- 363 29. Pariante P, Dotolo R, Venditti M, Ferrara D, Donizetti A, Aniello F, et al. First Evidence  
364 of DAAM1 Localization During the Post-Natal Development of Rat Testis and in  
365 Mammalian Sperm. *J Cell Physiol*. 2016;231: 2172–2184. doi:10.1002/jcp.25330
- 366 30. Strichman-Almashanu LZ, Bustin M, Landsman D. Retroposed copies of the HMG genes:  
367 a window to genome dynamics. *Genome Research*. Cold Spring Harbor Lab; 2003;13:  
368 800–812. doi:10.1101/gr.893803
- 369 31. Court F, Tayama C, Romanelli V, Martin-Trujillo A, Iglesias-Platas I, Okamura K, et al.  
370 Genome-wide parent-of-origin DNA methylation analysis reveals the intricacies of human  
371 imprinting and suggests a germline methylation-independent mechanism of establishment.  
372 *Genome Research*. Cold Spring Harbor Lab; 2014;24: 554–569.  
373 doi:10.1101/gr.164913.113
- 374 32. Joshi RS, Garg P, Zaitlen N, Lappalainen T, Watson CT, Azam N, et al. DNA  
375 Methylation Profiling of Uniparental Disomy Subjects Provides a Map of Parental  
376 Epigenetic Bias in the Human Genome. *Am J Hum Genet*. 2016;99: 555–566.  
377 doi:10.1016/j.ajhg.2016.06.032
- 378 33. Plasschaert RN, Bartolomei MS. Genomic imprinting in development, growth, behavior  
379 and stem cells. *Development*. 2014;141: 1805–1813. doi:10.1242/dev.101428
- 380 34. Cusanovich DA, Caliskan M, Billstrand C, Michelini K, Chavarria C, De Leon S, et al.  
381 Integrated analyses of gene expression and genetic association studies in a founder  
382 population. *Human Molecular Genetics*. 2016;25: 2104–2112. doi:10.1093/hmg/ddw061
- 383 35. Dobin A, Gingeras TR. Mapping RNA-seq Reads with STAR. Hoboken, NJ, USA: John  
384 Wiley & Sons, Inc; 2002. pp. 11.14.1–11.14.19. doi:10.1002/0471250953.bi1114s51

- 385 36. Martin M. Cutadapt removes adapter sequences from high-throughput sequencing reads.  
386 EMBnet j. 2011;17: 10. doi:10.14806/ej.17.1.200
- 387 37. van de Geijn B, McVicker G, Gilad Y, Pritchard JK. WASP: allele-specific software for  
388 robust molecular quantitative trait locus discovery. Nat Meth. NIH Public Access;  
389 2015;12: 1061–1063. doi:10.1038/nmeth.3582
- 390 38. Jun G, Flickinger M, Hetrick KN, Romm JM, Doheny KF, Abecasis GR, et al. Detecting  
391 and Estimating Contamination of Human DNA Samples in Sequencing and Array-Based  
392 Genotype Data. The American Journal of Human Genetics. 2012;91: 839–848.  
393 doi:10.1016/j.ajhg.2012.09.004
- 394 39. Stein MM, Hrusch CL, Gozdz J, Igartua C, Pivniouk V, Murray SE, et al. Innate  
395 Immunity and Asthma Risk in Amish and Hutterite Farm Children. N Engl J Med.  
396 2016;375: 411–421. doi:10.1056/NEJMoa1508749
- 397 40. Aryee MJ, Jaffe AE, Corrada-Bravo H, Ladd-Acosta C, Feinberg AP, Hansen KD, et al.  
398 Minfi: a flexible and comprehensive Bioconductor package for the analysis of Infinium  
399 DNA methylation microarrays. Bioinformatics. 2014;30: 1363–1369.  
400 doi:10.1093/bioinformatics/btu049
- 401 41. Maksimovic J, Gordon L, Oshlack A. SWAN: Subset-quantile within array normalization  
402 for illumina infinium HumanMethylation450 BeadChips. Genome Biol. 2012;13: R44.  
403 doi:10.1186/gb-2012-13-6-r44
- 404 42. Nicodemus-Johnson J, Myers RA, Sakabe NJ, Sobreira DR, Hogarth DK, Naureckas ET,  
405 et al. DNA methylation in lung cells is associated with asthma endotypes and genetic risk.  
406 JCI Insight. 2016;1: e90151. doi:10.1172/jci.insight.90151
- 407 43. Banovich NE, Lan X, McVicker G, van de Geijn B, Degner JF, Blischak JD, et al.  
408 Methylation QTLs are associated with coordinated changes in transcription factor binding,  
409 histone modifications, and gene expression levels. PLoS Genet. 2014;10: e1004663.  
410 doi:10.1371/journal.pgen.1004663
- 411 44. Johnson WE, Li C, Rabinovic A. Adjusting batch effects in microarray expression data  
412 using empirical Bayes methods. Biostatistics. 2007;8: 118–127.  
413 doi:10.1093/biostatistics/kxj037
- 414 45. Leek JT, Johnson WE, Parker HS, Jaffe AE, Storey JD. The sva package for removing  
415 batch effects and other unwanted variation in high-throughput experiments.  
416 Bioinformatics. 2012;28: 882–883. doi:10.1093/bioinformatics/bts034
- 417 46. Du P, Kibbe WA, Lin SM. lumi: a pipeline for processing Illumina microarray.  
418 Bioinformatics. 2008;24: 1547–1548. doi:10.1093/bioinformatics/btn224
- 419

## 420 Figures

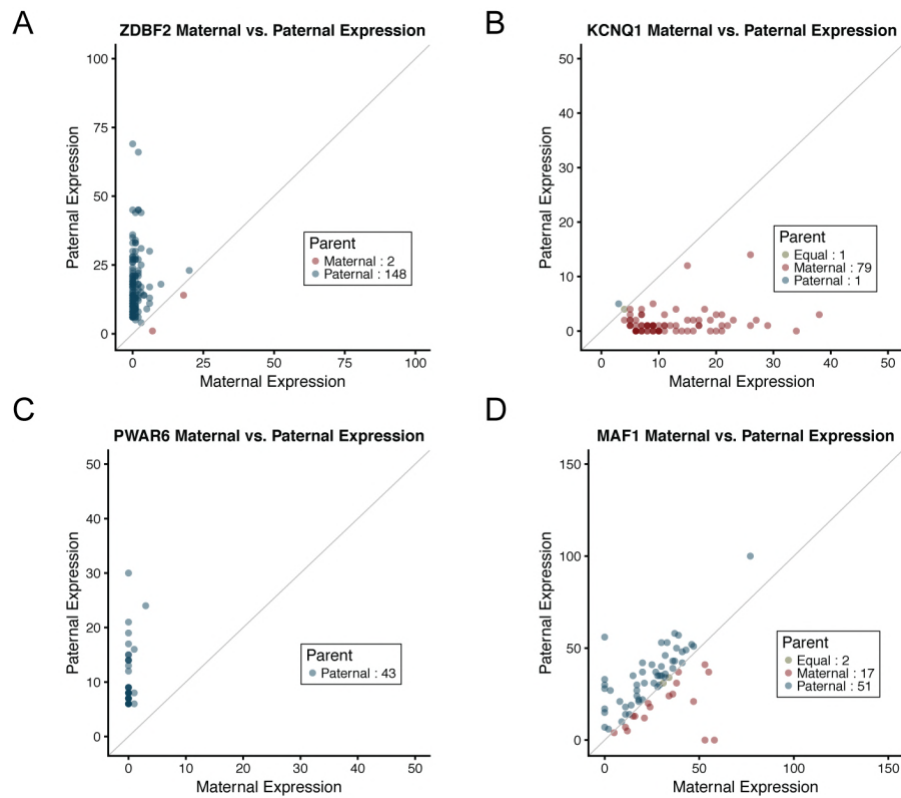

421

422 **Figure 1.** Plot of maternal (x-axis) and paternal (y-axis) gene expression for four genes. **(A)**

423 maternally imprinted gene *ZDBF2* (paternally expressed), **(B)** paternally imprinted gene *KCNQ1*

424 (maternally expressed), **(C)** novel maternally imprinted gene *PWAR6* (paternally expressed), **(D)**

425 gene with asymmetry in parental expression *MAFI*. Each point represents one individual.

426 Numbers in the legend represent the number of individuals with equal maternal and paternal

427 expression, more maternal expression, or more paternal expression.

A

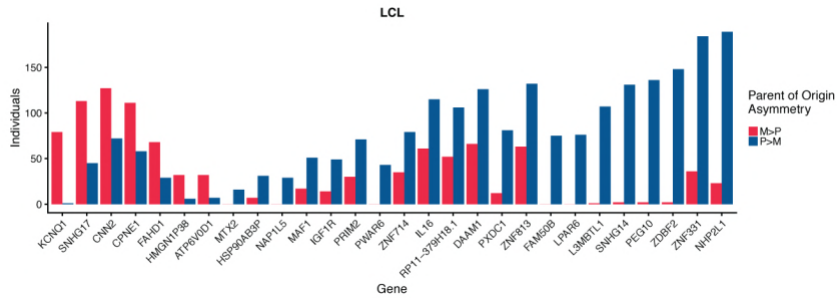

B

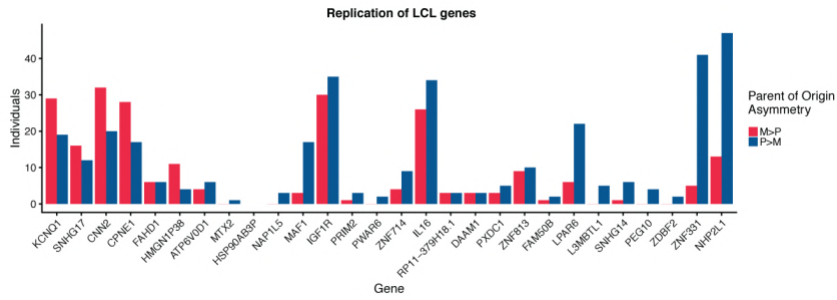

428

429 **Figure 2.** Histogram showing the number of individuals with more maternal expression (M>P)

430 or more paternal expression (P>M) for the 28 genes showing parent of origin asymmetry in (A)

431 LCLs and (B) PBLs. Genes are ordered by the magnitude of the difference in the number of

432 individuals with more maternal expression than paternal expression in LCLs.

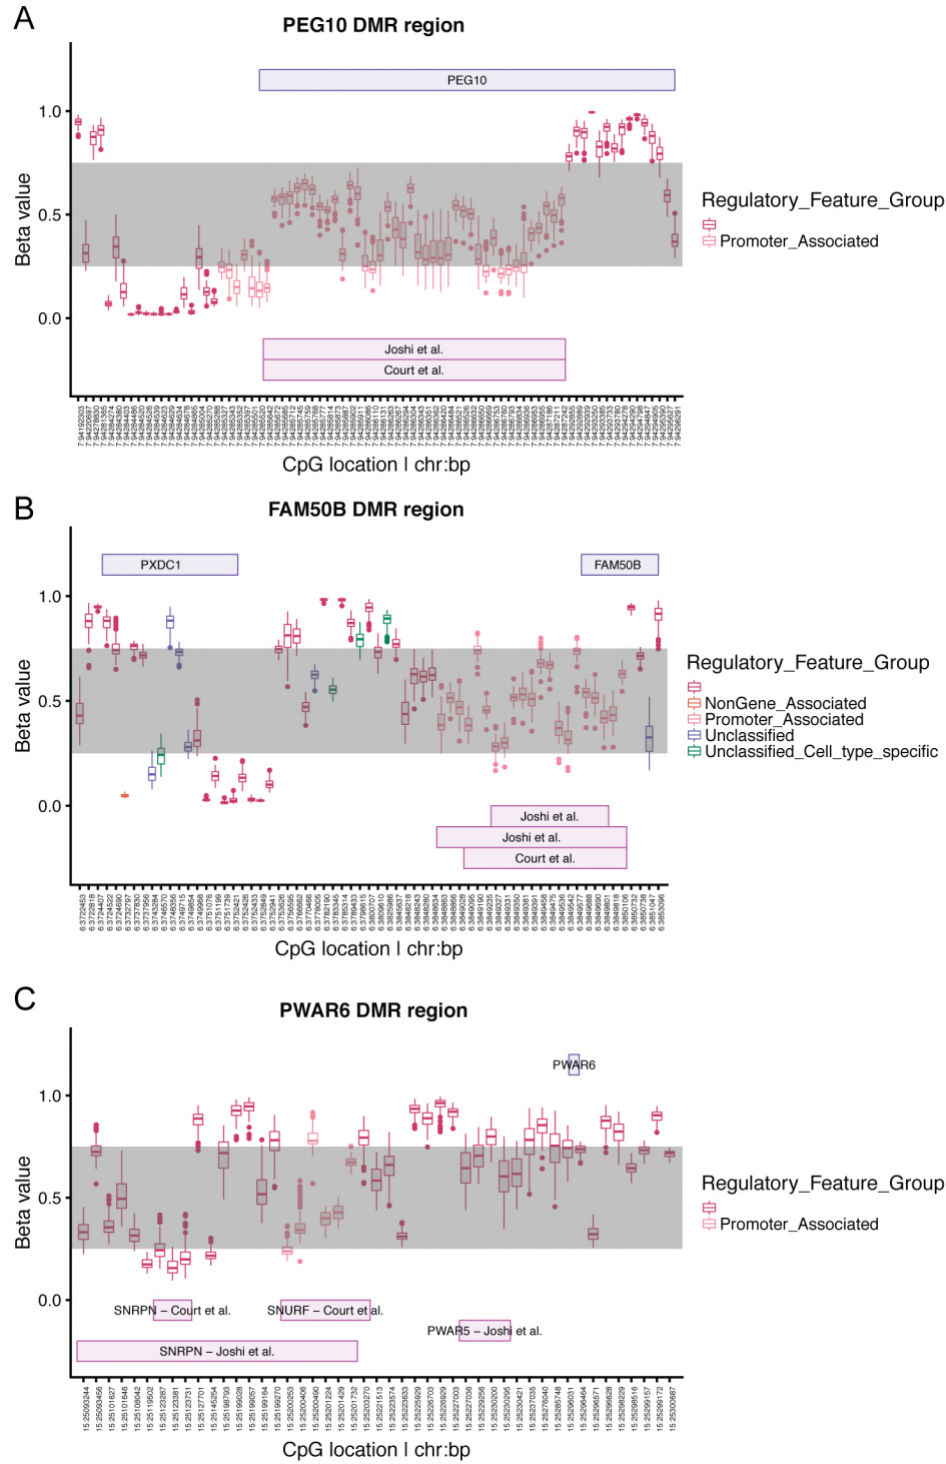

433

434 **Figure 3.** DNA methylation levels near known and novel imprinted genes previously defined by

435 Joshi et al. and Court et al. **(A) PEG10, (B) PXDC1 and FAM50B, (C) PWAR6.**

436

## 437 **Supporting Information**

438 **S1 Figure.** Plots of maternal and paternal expression for remaining genes with parent of origin  
439 asymmetry.

440 **S2 Figure.** Density plot for Differentially Methylated Regions (DMRs) for imprinted genes from  
441 Joshi et al and Court et al.

442 **S1 Table.** Genes expressed only on maternal or only on paternal haplotypes in LCLs.

443

444

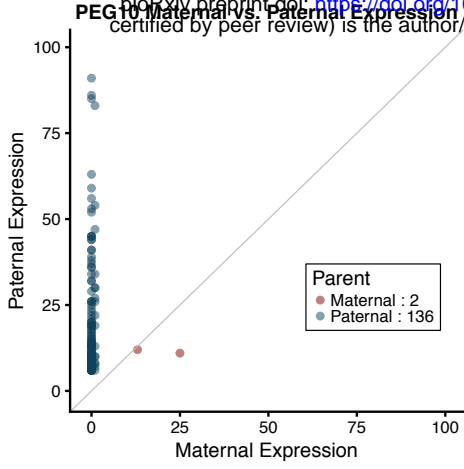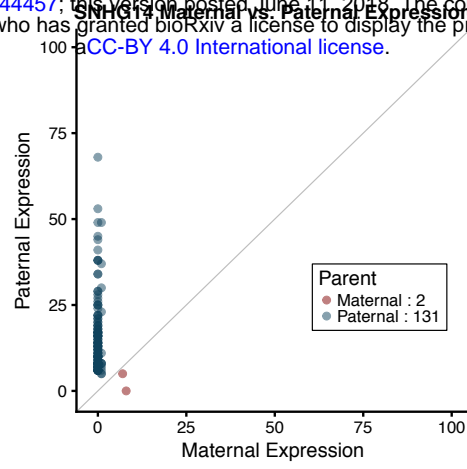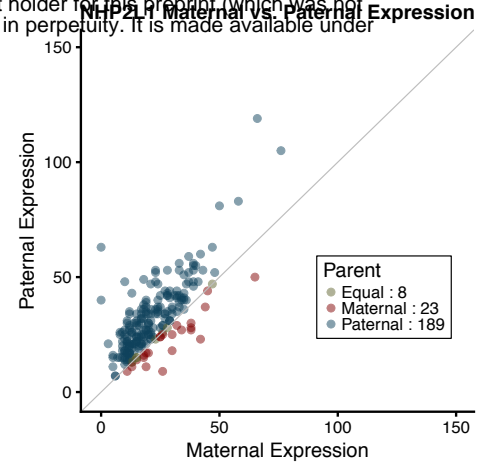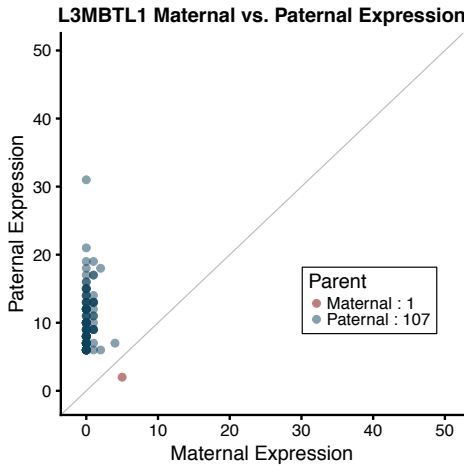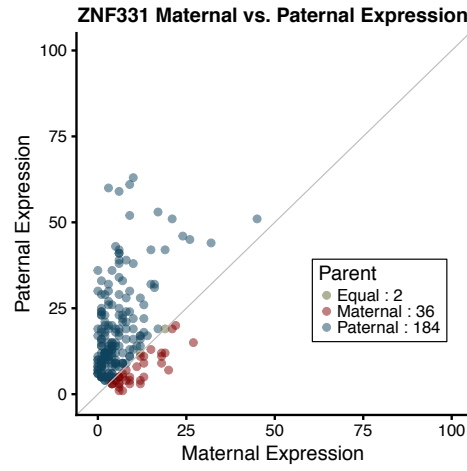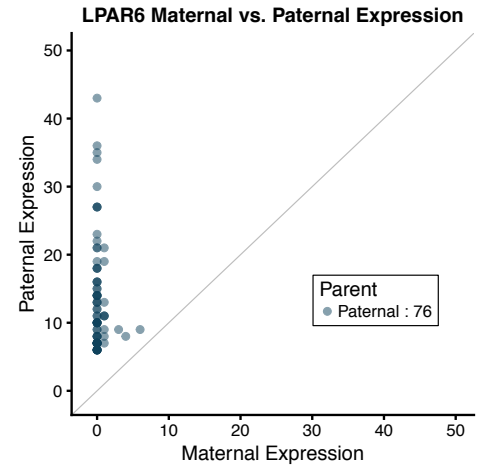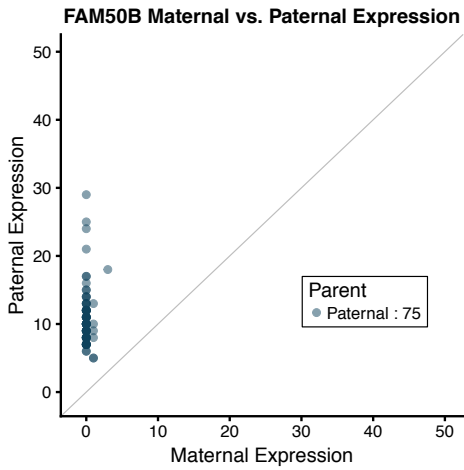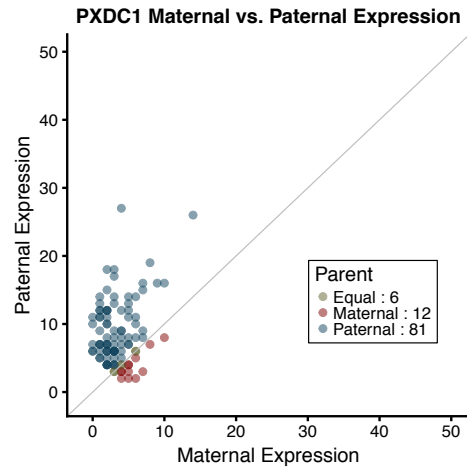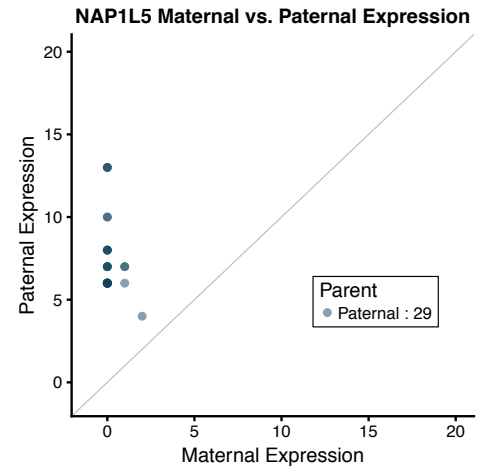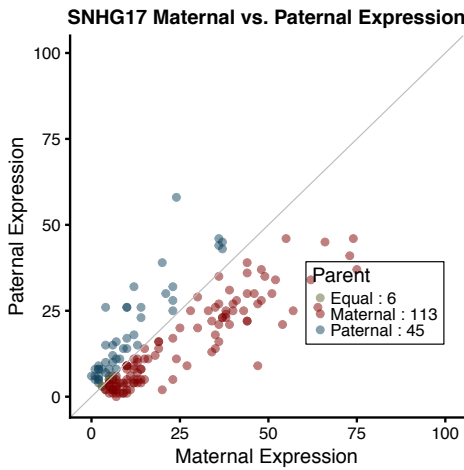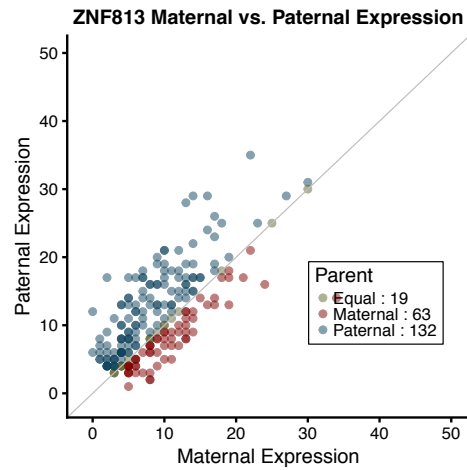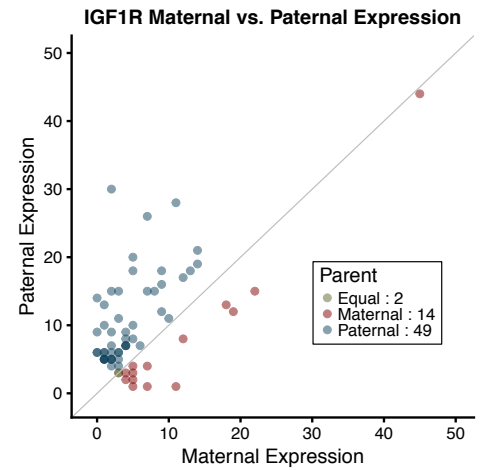

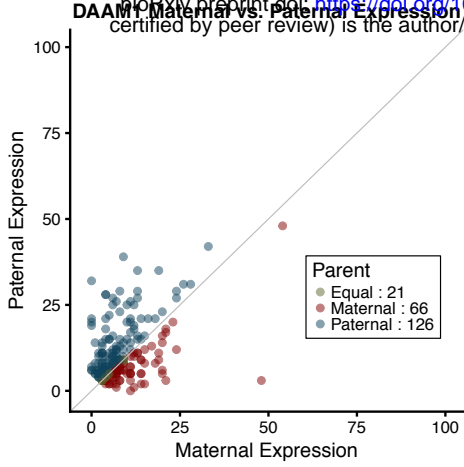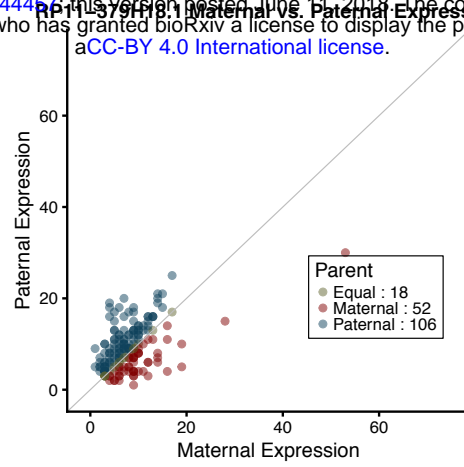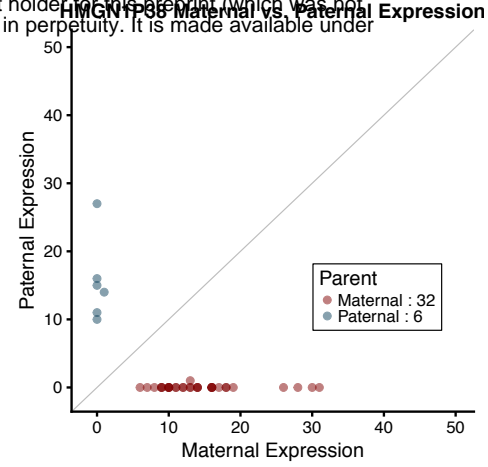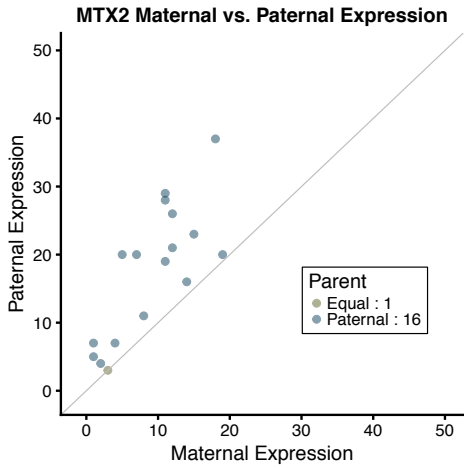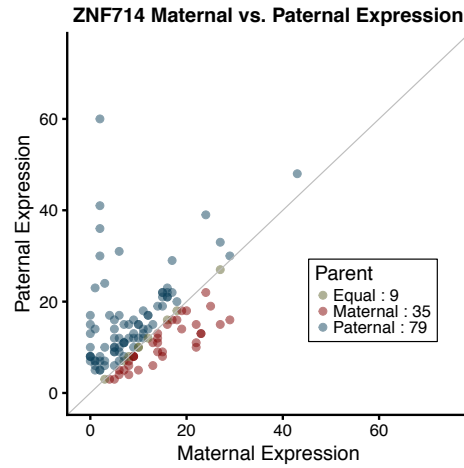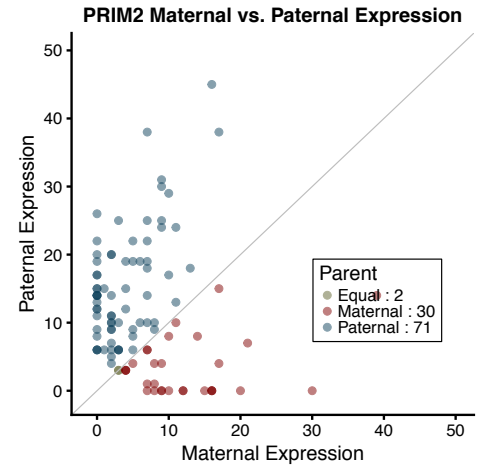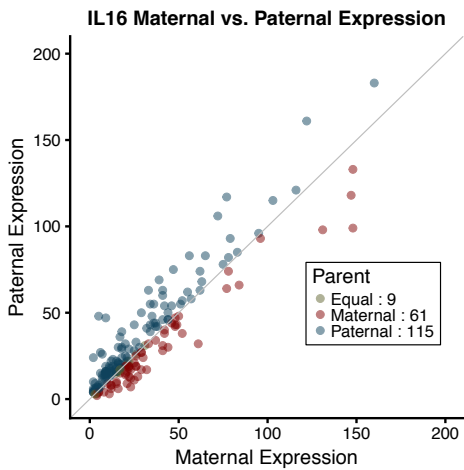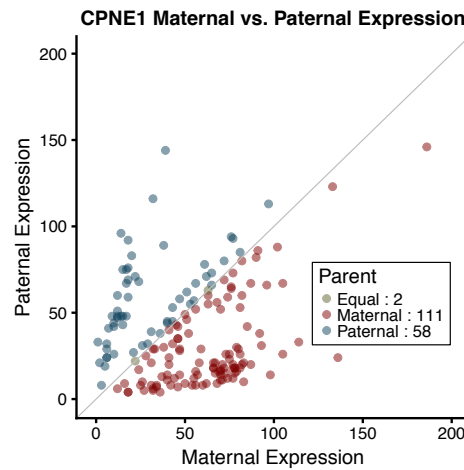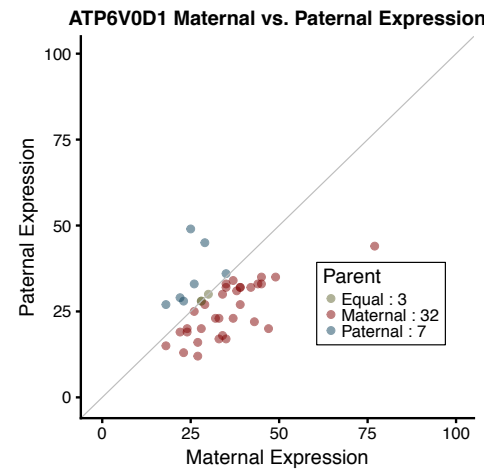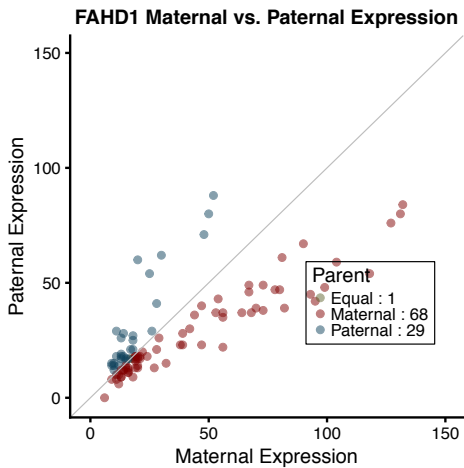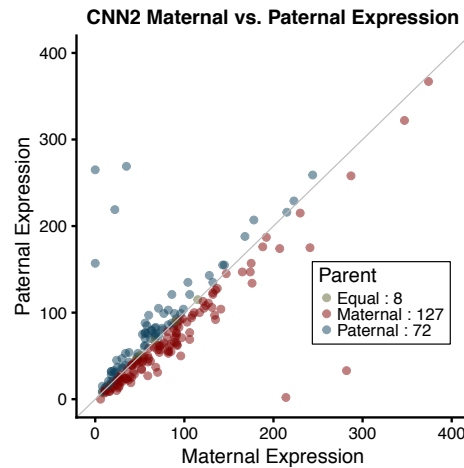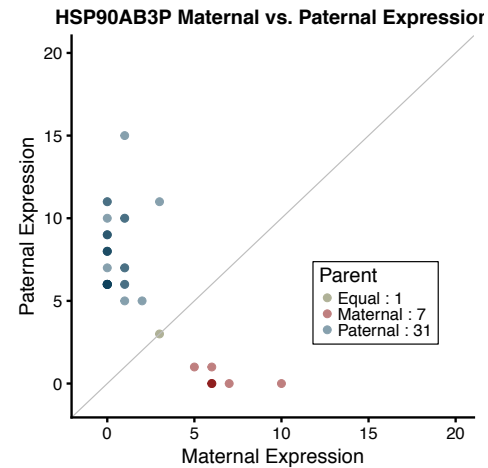



### Mean methylation at CpGs

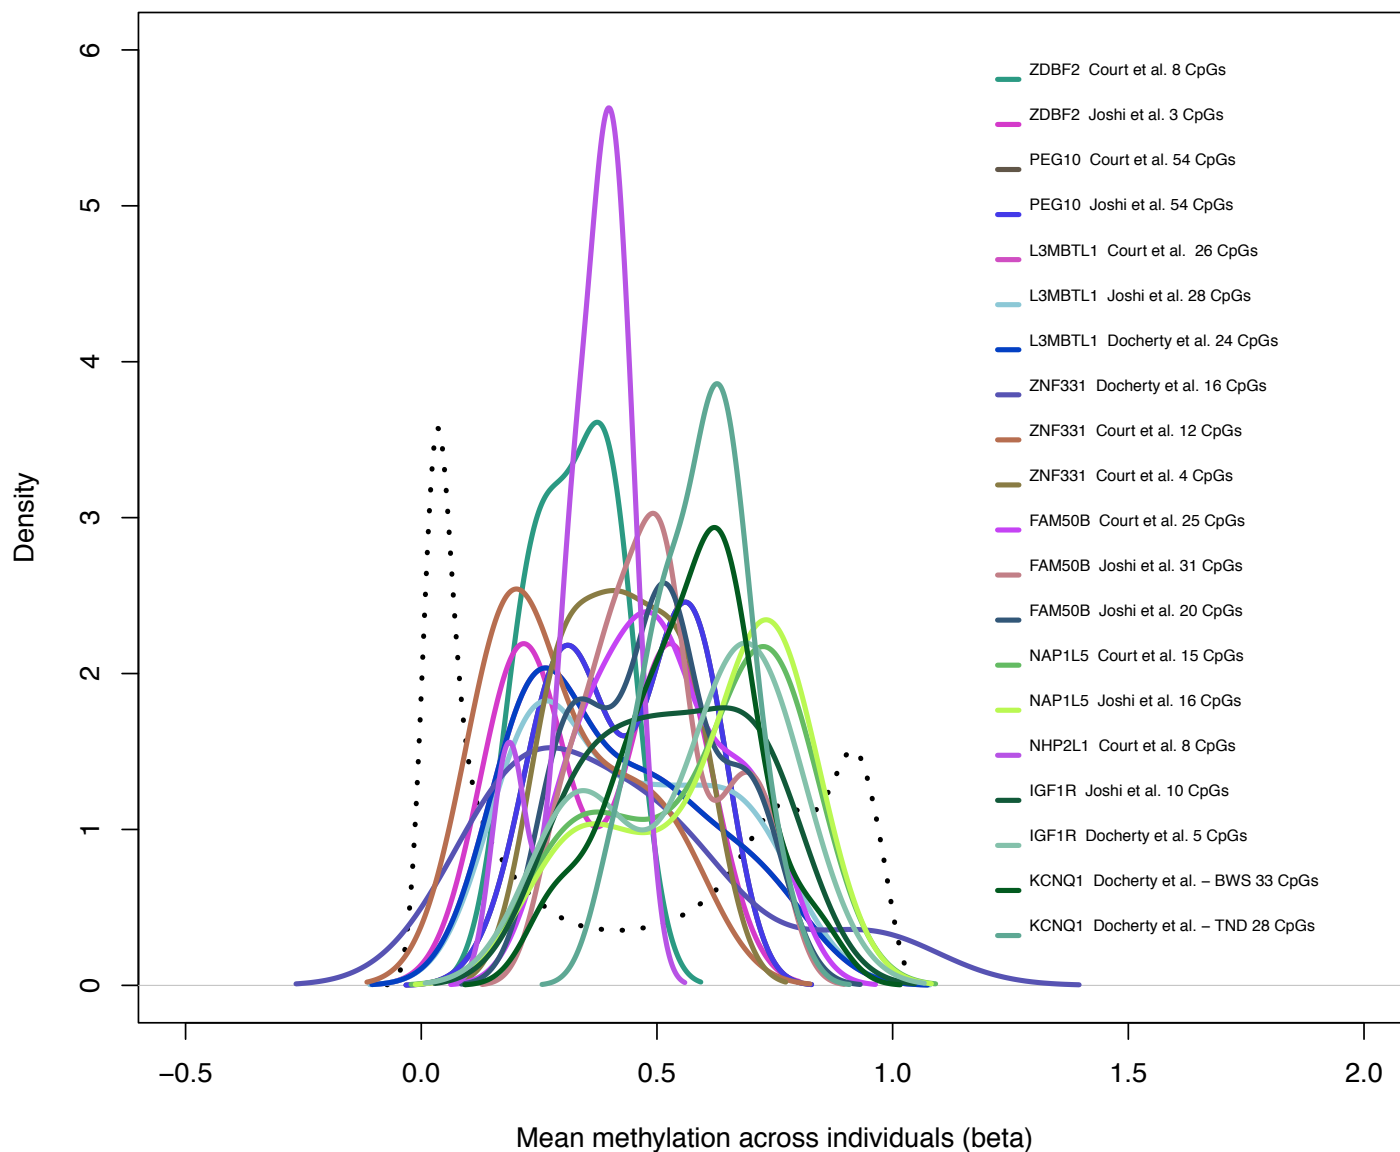

**Supplementary Table 1. Genes with only Maternal/only Paternal gene expression**

| Gene            | Number of<br>Individuals | Gene Name     | Imprinted<br>Status | Observed<br>Expression<br>Pattern in<br>LCLs | Pattern consistent<br>with known<br>expression? |
|-----------------|--------------------------|---------------|---------------------|----------------------------------------------|-------------------------------------------------|
| ENSG00000182636 | 22                       | NDN           | Known               | Paternal                                     | Consistent                                      |
| ENSG00000259261 | 11                       | IGHV4OR15-8   |                     | Maternal                                     |                                                 |
| ENSG00000128739 | 9                        | SNRPN         | Known               | Paternal                                     | Consistent                                      |
| ENSG00000185044 | 9                        | RP11-435B5.4  |                     | Maternal                                     |                                                 |
| ENSG00000089876 | 6                        | DHX32         |                     | Paternal                                     |                                                 |
| ENSG00000262333 | 5                        | HNRNPA1P16    |                     | Paternal                                     |                                                 |
| ENSG00000196378 | 5                        | ZNF34         |                     | Maternal                                     |                                                 |
| ENSG00000198744 | 5                        | RP5-857K21.11 |                     | Maternal                                     |                                                 |
| ENSG00000233757 | 5                        | AC092835.2    |                     | Maternal                                     |                                                 |
| ENSG00000272933 | 5                        | RP11-47A8.5   |                     | Maternal                                     |                                                 |
| ENSG00000154611 | 4                        | PSMA8         |                     | Paternal                                     |                                                 |
| ENSG00000228109 | 4                        | MFI2-AS1      |                     | Paternal                                     |                                                 |
| ENSG00000103269 | 4                        | RHBDL1        |                     | Maternal                                     |                                                 |
| ENSG00000129654 | 4                        | FOXJ1         |                     | Maternal                                     |                                                 |
| ENSG00000129757 | 3                        | CDKN1C        | Known               | Paternal                                     | Inconsistent                                    |
| ENSG00000137936 | 3                        | BCAR3         |                     | Paternal                                     |                                                 |
| ENSG00000148926 | 3                        | ADM           |                     | Paternal                                     |                                                 |
| ENSG00000204482 | 3                        | LST1          |                     | Paternal                                     |                                                 |
| ENSG00000211669 | 3                        | IGLV3-10      |                     | Paternal                                     |                                                 |
| ENSG00000223509 | 3                        | RP11-632K20.7 |                     | Paternal                                     |                                                 |
| ENSG00000260442 | 3                        | RP11-22P6.3   |                     | Paternal                                     |                                                 |
| ENSG00000270441 | 3                        | RP11-694I15.7 |                     | Paternal                                     |                                                 |
| ENSG00000160828 | 3                        | STAG3L2       |                     | Maternal                                     |                                                 |
| ENSG00000165886 | 3                        | UBTD1         |                     | Maternal                                     |                                                 |
| ENSG00000181284 | 3                        | TMEM102       |                     | Maternal                                     |                                                 |
| ENSG00000214269 | 3                        | LGMNP1        |                     | Maternal                                     |                                                 |
| ENSG00000258561 | 3                        | RP11-72M17.1  |                     | Maternal                                     |                                                 |
| ENSG00000075089 | 2                        | ACTR6         |                     | Paternal                                     |                                                 |
| ENSG00000105518 | 2                        | TMEM205       |                     | Paternal                                     |                                                 |
| ENSG00000115457 | 2                        | IGFBP2        |                     | Paternal                                     |                                                 |
| ENSG00000137821 | 2                        | LRRC49        |                     | Paternal                                     |                                                 |
| ENSG00000158517 | 2                        | NCF1          |                     | Paternal                                     |                                                 |
| ENSG00000183604 | 2                        | RP11-347C12.2 |                     | Paternal                                     |                                                 |
| ENSG00000211637 | 2                        | IGLV4-69      |                     | Paternal                                     |                                                 |
| ENSG00000211940 | 2                        | IGHV3-9       |                     | Paternal                                     |                                                 |
| ENSG00000233426 | 2                        | EIF3FP3       |                     | Paternal                                     |                                                 |
| ENSG00000240041 | 2                        | IGHJ4         |                     | Paternal                                     |                                                 |
| ENSG00000240731 | 2                        | RP5-890O3.9   |                     | Paternal                                     |                                                 |

|                 |                 |          |
|-----------------|-----------------|----------|
| ENSG00000272145 | 2 NFYC-AS1      | Paternal |
| ENSG00000025156 | 2 HSF2          | Maternal |
| ENSG00000108298 | 2 RPL19         | Maternal |
| ENSG00000133216 | 2 EPHB2         | Maternal |
| ENSG00000133328 | 2 HRASLS2       | Maternal |
| ENSG00000134864 | 2 GGACT         | Maternal |
| ENSG00000158481 | 2 CD1C          | Maternal |
| ENSG00000169019 | 2 COMMD8        | Maternal |
| ENSG00000175701 | 2 LINC00116     | Maternal |
| ENSG00000196465 | 2 MYL6B         | Maternal |
| ENSG00000198155 | 2 ZNF876P       | Maternal |
| ENSG00000215030 | 2 RPL13P12      | Maternal |
| ENSG00000232640 | 2 RP1-266L20.2  | Maternal |
| ENSG00000233493 | 2 TMEM238       | Maternal |
| ENSG00000235400 | 2 RP4-641G12.4  | Maternal |
| ENSG00000240652 | 2 RP11-832N8.1  | Maternal |
| ENSG00000243364 | 2 EFNA4         | Maternal |
| ENSG00000255135 | 2 RP11-111M22.3 | Maternal |
| ENSG00000267152 | 2 CTD-2528L19.6 | Maternal |
| ENSG00000033122 | 1 LRRC7         | Paternal |
| ENSG00000096080 | 1 MRPS18A       | Paternal |
| ENSG00000100442 | 1 FKBP3         | Paternal |
| ENSG00000100632 | 1 ERH           | Paternal |
| ENSG00000109083 | 1 IFT20         | Paternal |
| ENSG00000111875 | 1 ASF1A         | Paternal |
| ENSG00000116819 | 1 TFAP2E        | Paternal |
| ENSG00000121089 | 1 NACA3P        | Paternal |
| ENSG00000122218 | 1 COPA          | Paternal |
| ENSG00000128011 | 1 LRFN1         | Paternal |
| ENSG00000129673 | 1 AANAT         | Paternal |
| ENSG00000140459 | 1 CYP11A1       | Paternal |
| ENSG00000148187 | 1 MRRF          | Paternal |
| ENSG00000150456 | 1 N6AMT2        | Paternal |
| ENSG00000151366 | 1 NDUFC2        | Paternal |
| ENSG00000154640 | 1 BTG3          | Paternal |
| ENSG00000158716 | 1 DUSP23        | Paternal |
| ENSG00000158806 | 1 NPM2          | Paternal |
| ENSG00000163634 | 1 THOC7         | Paternal |
| ENSG00000165121 | 1 RP11-213G2.3  | Paternal |
| ENSG00000167286 | 1 CD3D          | Paternal |
| ENSG00000173715 | 1 C11orf80      | Paternal |
| ENSG00000173762 | 1 CD7           | Paternal |
| ENSG00000175550 | 1 DRAP1         | Paternal |

|                 |                  |           |          |            |
|-----------------|------------------|-----------|----------|------------|
| ENSG00000179603 | 1 GRM8           |           | Paternal |            |
| ENSG00000181038 | 1 METTL23        |           | Paternal |            |
| ENSG00000181852 | 1 RNF41          |           | Paternal |            |
| ENSG00000183506 | 1 PI4KAP2        |           | Paternal |            |
| ENSG00000197568 | 1 HHLA3          |           | Paternal |            |
| ENSG00000198356 | 1 ASNA1          |           | Paternal |            |
| ENSG00000204472 | 1 AIF1           |           | Paternal |            |
| ENSG00000211594 | 1 IGKJ4          |           | Paternal |            |
| ENSG00000211595 | 1 IGKJ3          |           | Paternal |            |
| ENSG00000211965 | 1 IGHV3-49       |           | Paternal |            |
| ENSG00000215548 | 1 RP11-764K9.4   |           | Paternal |            |
| ENSG00000225329 | 1 RP11-325F22.5  |           | Paternal |            |
| ENSG00000226121 | 1 AHCTF1P1       |           | Paternal |            |
| ENSG00000233912 | 1 AC026202.3     |           | Paternal |            |
| ENSG00000239819 | 1 IGKV1D-8       |           | Paternal |            |
| ENSG00000239830 | 1 RPS4XP22       |           | Paternal |            |
| ENSG00000243312 | 1 RP11-397E7.1   |           | Paternal |            |
| ENSG00000244055 | 1 AC007566.10    |           | Paternal |            |
| ENSG00000253998 | 1 IGKV2-29       |           | Paternal |            |
| ENSG00000257261 | 1 RP11-96H19.1   |           | Paternal |            |
| ENSG00000259699 | 1 HMGB1P8        |           | Paternal |            |
| ENSG00000260219 | 1 RP11-347C12.10 |           | Paternal |            |
| ENSG00000260655 | 1 CTA-250D10.23  |           | Paternal |            |
| ENSG00000264473 | 1 hsa-mir-4538   |           | Paternal |            |
| ENSG00000268568 | 1 AC007228.9     |           | Paternal |            |
| ENSG00000106211 | 1 HSPB1          |           | Maternal |            |
| ENSG00000118514 | 1 ALDH8A1        |           | Maternal |            |
| ENSG00000126709 | 1 IFI6           |           | Maternal |            |
| ENSG00000131773 | 1 KHDRBS3        |           | Maternal |            |
| ENSG00000135914 | 1 HTR2B          |           | Maternal |            |
| ENSG00000136104 | 1 RNASEH2B       |           | Maternal |            |
| ENSG00000136463 | 1 TACO1          |           | Maternal |            |
| ENSG00000148444 | 1 COMMD3         |           | Maternal |            |
| ENSG00000156873 | 1 PHKG2          |           | Maternal |            |
| ENSG00000163249 | 1 CCNYL1         |           | Maternal |            |
| ENSG00000164794 | 1 KCNV1          |           | Maternal |            |
| ENSG00000172586 | 1 CHCHD1         |           | Maternal |            |
| ENSG00000174871 | 1 CNIH2          |           | Maternal |            |
| ENSG00000178922 | 1 HYI            |           | Maternal |            |
| ENSG00000183426 | 1 NPIPA1         |           | Maternal |            |
| ENSG00000185885 | 1 IFITM1         | Predicted | Maternal | Consistent |
| ENSG00000197279 | 1 ZNF165         |           | Maternal |            |
| ENSG00000199753 | 1 SNORD104       |           | Maternal |            |

|                 |                 |          |
|-----------------|-----------------|----------|
| ENSG00000215302 | 1 CTD-3092A11.1 | Maternal |
| ENSG00000226085 | 1 UQCRFS1P1     | Maternal |
| ENSG00000227053 | 1 RP11-395B7.4  | Maternal |
| ENSG00000232573 | 1 RPL3P4        | Maternal |
| ENSG00000237973 | 1 hsa-mir-6723  | Maternal |
| ENSG00000240356 | 1 RPL23AP7      | Maternal |
| ENSG00000240449 | 1 RP4-584D14.5  | Maternal |
| ENSG00000253485 | 1 PCDHGA5       | Maternal |
| ENSG00000254681 | 1 PKD1P5        | Maternal |
| ENSG00000254887 | 1 CTC-378H22.1  | Maternal |
| ENSG00000261504 | 1 RP11-317P15.4 | Maternal |
| ENSG00000262691 | 1 CTC-277H1.7   | Maternal |
| ENSG00000266208 | 1 CTD-2267D19.3 | Maternal |
| ENSG00000268030 | 1 AC005253.2    | Maternal |
| ENSG00000272468 | 1 RP1-86C11.7   | Maternal |
